# Supplementary figures and images for: An injectable elastic hydrogel crosslinked with curcumin–gelatin nanoparticles as a multifunctional dressing for the rapid repair of bacterially infected wounds
Source: Royal Society of Chemistry journal article supplement (doi:10.1039/d2bm02126a), 2023-01-01

Fig. S1

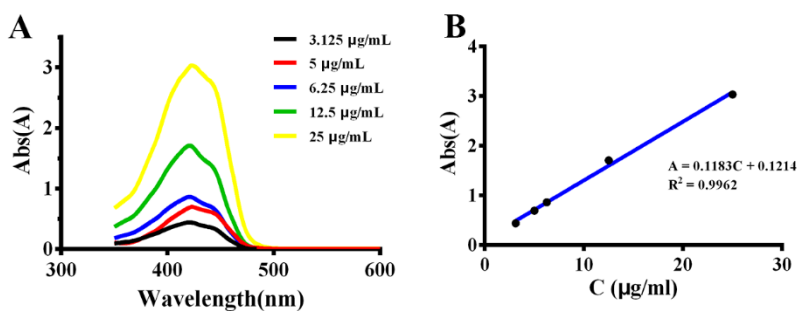

Fig. S2

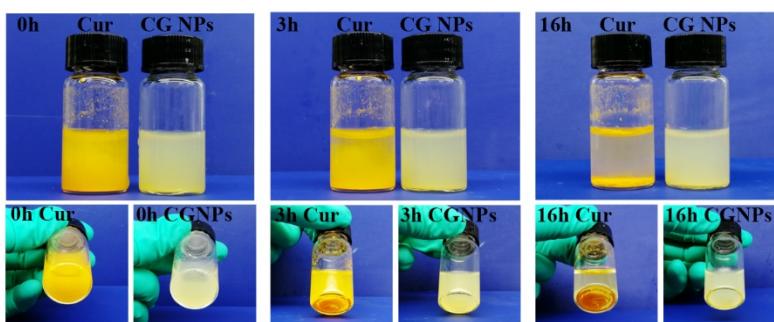

Fig.S3

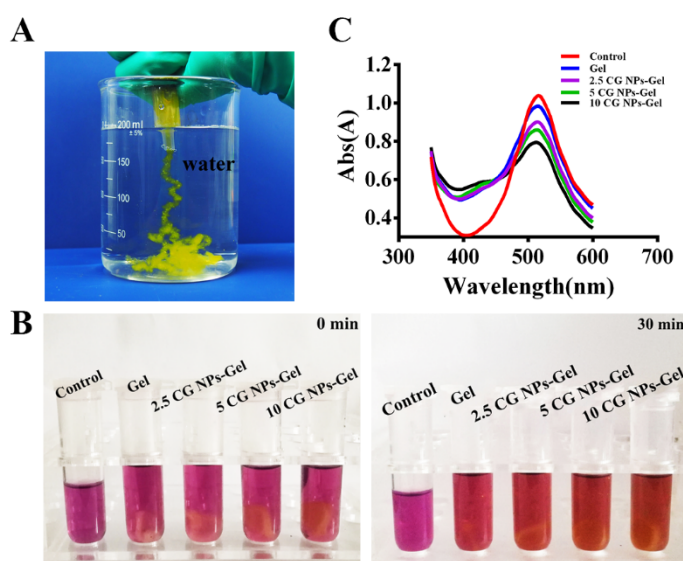

Fig. S4

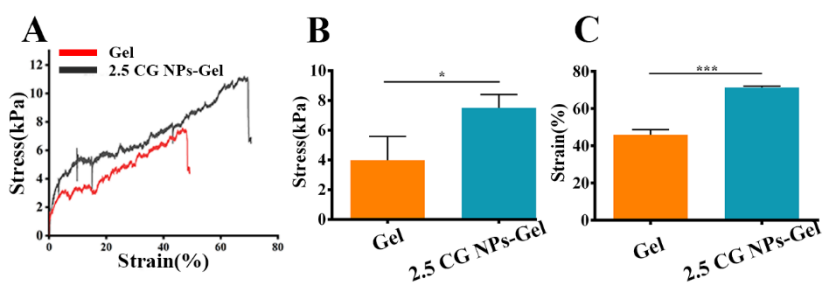

Fig. S5

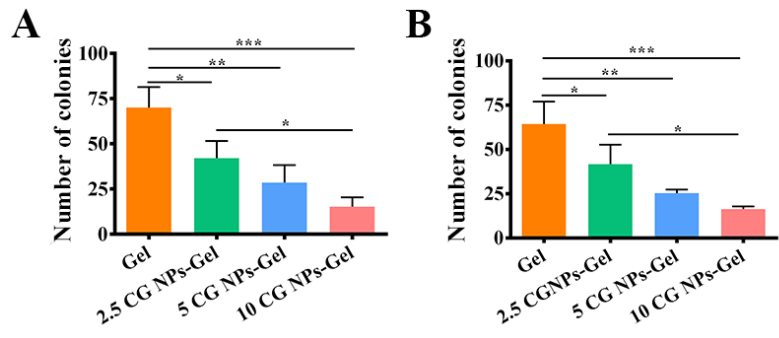

Fig. S6

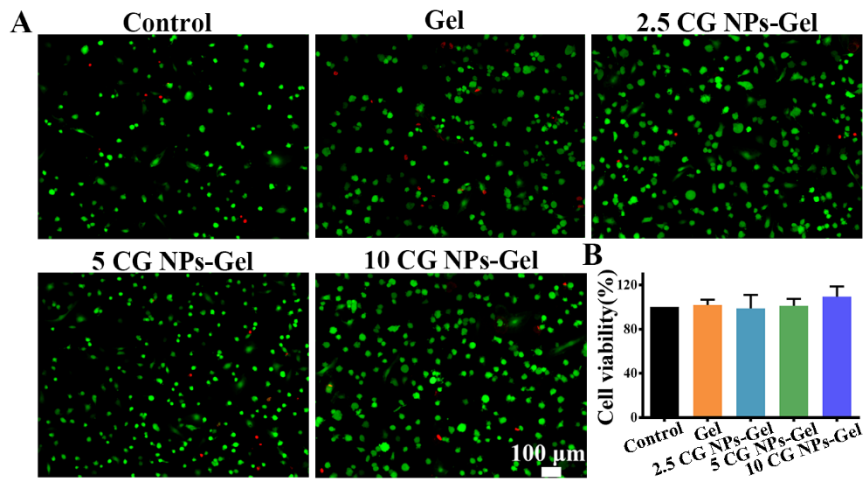

Supplement: d2bm02126a1.pdf [file d2bm02126a1.pdf]
